# Supplementary material for: Preparation of 1-phenylcyclohexa-2,5-diene-1-carboxylates and their use in free-radical mediated synthesesElectronic supplementary information (ESI) available: experimental procedures for the preparation of 1,4-dihydrobiphenyl,9 1-deuterio-1,4-dihydrobiphenyl, 1-phenylcyclohexa-2,5-diene-1-carboxylic acid with 3,4-dihydrobiphenyl-3-carboxylic acid, 2-(cyclohex-2-enyloxy)ethyl 1-phenylcyclohexa-2,5-diene-1-carboxylate and non-1-en-6-ol. Experimental details of the reactions of cyclopentyl 1-phenylcyclohexa-2,5-diene-1-carboxylate with cyclohexenone, methyl acrylate, methyl methacrylate, acrylonitrile and cyclohexene are included. See http://www.rsc.org/suppdata/p1/b1/b110527m/
Source: Royal Society of Chemistry journal article supplement (doi:10.1039/b110527m), 2002-01-09
Supplement: b110527m.doc [file b110527m.doc]

**Supplementary data**

**1,4-Dihydrobiphenyl (4)** 9

Biphenyl (17 g, 0.11 mol) was dissolved in dry ether (500 cm3) and added to ammonia (1 dm3). To this, Li (1.7 g, 0.245 mol) was added portionwise and the resulting deep blue solution was stirred for 25 min. The colour was discharged by careful addition of NH4Cl (*ca*. 80 g) followed by H2O (250 cm3) and ether (200 cm3). The ether layer was separated, washed with H2O (2 x 100 cm3), dried (MgSO4) and evaporated. The title compound was obtained as a clear, colourless liquid after distillation (15.8 g, 92%), bp 70 °C at 0.1 mmHg; H 2.72-2.82 (2 H, m, allylic-H), 3.92-4.07 (1 H, t, *J* 8.0, *t*-H), 5.70-5.90 (4 H, m, CH=), 7.20-7.40 (5 H, m, ArH); C (50 MHz) 26.4 (allylic-C), 42.6 (*t*-C), 124.3 (2 x ArC), 126.9 (2 x C=), 128.6 (2 x C=), 129.1 (3 x ArCH), 145.7 (C).

**1-Deuterio-1,4-dihydrobiphenyl (5)**

1,4-Dihydrobiphenyl (2 g, 13 mmol) was dissolved in dry THF (60 cm3) under an atmosphere of N2. To this was added BuLi (0.90 g, 14 mmol) at –10 °C and the deep red solution was stirred for 5 h at approximately –10 °C. The mixture was quenched with D2O (0.31 g, 15 mmol) dissolved in dry THF (1 cm3). After 15 min the solvent was evaporated and ether (50 cm3) and H2O (50 cm3) were added to the residue. The aqueous layer was extracted with ether (50 cm3), the ethereal extracts were combined, dried (MgSO4) and the solvent was evaporated to give a yellow liquid (1.78 g) consisting of the title compound (1.1 g, 55%) and biphenyl (0.61 g, 31%); H 2.76-2.84 (2 H, m, allylic-H), 5.74-5.92 (4 H, m, CH=), 7.25-7.70 (15 H, m, ArH, biphenyl); D (46 MHz) 4.05 (1 D, s, *t*-D); GC/MS *peak no. 329*, *m/z* (rel. intensity), 157 (M+, 100), 142 (36), 129 (66), 116 (44), 104 (31), 91 (52), 78 (60), 51 (39), 1-deuterio-1,4-dihydrobiphenyl.

**1-Phenylcyclohexa-2,5-diene-1-carboxylic acid and 3,4-dihydrobiphenyl-3-carboxylic acid (6 and 7)**

1,4-Dihydrobiphenyl (5 g, 32 mmol) was dissolved in dry THF (150 cm3) under an atmosphere of N2 , and to this was added BuLi (2.26 g, 35 mmol) at –40 °C . The mixture was left stirring for 80 min as the temperature was allowed to rise to 0 °C , then cooled to –70 °C and poured into a conical flask containing solid carbon dioxide. The contents were left overnight and the product was extracted using NaOH (2 x 100 cm3) and washed with light petroleum (75 cm3). The carboxylic acids were regenerated using excess HCl, extracted with ether (3 x 100 cm3), the combined ethereal extracts were dried (MgSO4) and the solvent was evaporated to yield a white solid (5.0 g) which was a mixture of acids **6** (55%) and **7** (24%).

**2-(Cyclohex-2-enyloxy)ethyl 1-phenylcyclohexa-2,5-diene-1-carboxylate (11) from acid mixture (6 + 7)**

Thionyl chloride (1.07 g, 9.0 mmol) in dry ether (2 cm3) and added to a mixture of carboxylic acids **6** and **7** (2.64 g, 13.4 mmol) in dry ether (10 cm3). This mixture was refluxed for 6.5 h and the solvent was evaporated to yield acid chloride **8** and the aromatic counterpart, (some biphenyl had also formed). The acid chlorides were dissolved in dry ether (10 cm3), added to 3-(2-hydroxyethoxy)cyclohexene (1.56 g, 11 mmol) in dry ether (5 cm3) and refluxed for 18 h. The mixture was washed with NaOH (15 cm3) and the ether fraction was dried (MgSO4) and the solvent was evaporated to give a yellow oil (2.12 g). The title compound was obtained as a pale yellow oil by column chromatography eluting with 10 % ethyl acetate in light petroleum (0.5 g, 30 %); 1H NMR indicated 9 % of the aromatic ester.

Non-1-en-6-ol

To magnesium (1.10 g, 0.045 mol) in dry ether (25 cm3) was added dropwise a solution of 5-bromopent-1-ene (5.0 g, 0.034 mol) in dry ether (25 cm3). The remaining bromopentene was then added at a rate that allowed the solution to gently reflux. After addition, the solution was refluxed for 30 min before a mixture of butyraldehyde (2.42 g, 0.034 mol) in dry ether (50 cm3) was added dropwise to the newly formed Grignard reagent. The resultant solution was refluxed for a further 30 min, the ethereal layer was decanted onto ice (350 g) containing HCl (25 cm3). The ethereal layer was washed with 2M HCl (3 x 50 cm3) and water (2 x 50 cm3), dried (MgSO4) and the solvent evaporated to yield a yellow oil (4.15 g). The title compound was obtained as a clear, colourless liquid by distillation (2.87 g, 60 %), bp 73 C at 0.1 mmHg; H (lit.10) 0.90 (3 H, t, CH3), 1.35-1.65 (8 H, m, CH2), 1.8-1.89 (1 H, s, OH), 2.0-2.16 (2 H, m, CH2,  to vinyl), 3.57-3.67 (1 H, q, CH, attached to alcohol), 4.9-5.08 (2 H, m, CH2=), 5.70-5.91 (1 H, q, CH=); *m/z* (rel. intensity) 124 (1), 99 (20), 81 (55), 73 (24), 57 (22), 55 (100), 43 (65), 41 (49), 39 (31).

The reaction of cyclopentyl 1-phenylcyclohexa-2,5-diene-1-carboxylate (10) with cyclohexenone.

Cyclopentyl 1-phenylcyclohexa-2,5-diene-1-carboxylate (0.050 g, 0.19 mmol), cyclohexenone (0.05 g, 0.58 mmol) and dibenzoyl peroxide (0.01 g, 50 %wt.) were dissolved in benzene (0.5 cm3). The mixture was refluxed for 24 h before a further portion of dibenzoyl peroxide (0.01 g) was added. After a total of 48 h reflux, the solvent was evaporated and the products analysed by GC/MS; *peak no. 405,* benzoic acid; *peak no. 444,* biphenyl; *peak no. 468,* *m/z* (rel. intensity) 166 (3), 153 (2), 123 (13), 108 (24), 97 (100), 81 (11), 69 (30), 67 (35), 55 (65), 41 (75), 3-cyclopentylcyclohexenone (5 %); *peak no. 523,* 3-phenylcylohexanone; *peak no. 800,* unreacted cyclopentyl 1-phenylcyclohexa-2,5-diene-1-carboxylate. This reaction was also carried out on a similar scale in di*-tert*-butyl peroxide (0.5 cm3) as solvent, initiating with light from a 400 W medium pressure Hg lamp. The adduct was formed in a slightly higher yield of 12 %, but the GC/MS analysis showed the presence of significant quantities of two isomers of the photodimer from cyclohexenone.

The peroxide-initiated reaction of cyclopentyl 1-phenylcyclohexa-2,5-diene-1-carboxylate (10) with methyl acrylate in benzene.

Cyclopentyl 1-phenylcyclohexa-2,5-diene-1-carboxylate (0.036 g, 0.14 mmol), methyl acrylate (0.04 g, 0.46 mmol) and dibenzoyl peroxide (0.01 g, 50 %wt.) were dissolved in benzene (0.5 cm3). The mixture was refluxed for 24 h before a further portion of dibenzoyl peroxide (0.01 g) was added. After a total of 48 h reflux, the solvent was evaporated and the products analysed by GC/MS; *peak no. 327,* *m/z* (rel. intensity) 141 (2), 125 (11), 107 (5), 87 (64), 83 (48), 74 (100), 67 (22), 55 (45), 43 (28), 41 (42), methyl 3-cyclopentylpropanoate (adduct) (12 %); *peak no. 401,* benzoic acid; *peak no. 444,* biphenyl, *peak no. 799,* unreacted **10**.

**Homolytic reactions of 10 with acrylonitrile, cyclohexene and methyl methacrylate.**

Reactions were carried out with several other alkenes using similar conditions. Acrylonitrile gave the corresponding adduct (10 %), methyl methacrylate gave the corresponding adduct (10 %) and cyclohexene afforded 5 % of the corresponding adduct. In each case much of the starting ester remained at the end of the reaction.

The radical-initiated reaction of 1-phenylcyclohexa-2,5-diene-1-carboxylic acid 6 with cyclohexenone.

Acid **6** (0.025 g, 0.125 mmol), cyclohexenone (0.026 g, 0.27 mmol) and dibenzoyl peroxide (0.01 g, 50 %wt.) were dissolved in benzene (0.5 cm3). The mixture was refluxed for 24 h before a further portion of dibenzoyl peroxide (0.01 g) was added. After a total of 48 h reflux, the solvent was evaporated and the products analysed by GC/MS; but this showed only benzoic acid, biphenyl and traces of 3-phenylcyclohexanone.

# References

9 D. F. Lindow, C. N. Cortez and R. G. Harvey, *J. Am. Chem. Soc*., 1972, **94**, 5406.

10 D. F. Taber, P. B. Deker and L. J. Silverberg, *J. Org. Chem*., 1992, **57**, 5990.
